# Supplementary material for: Iron-embedded C2N monolayer: a promising low-cost and high-activity single-atom catalyst for CO oxidation
Source: Royal Society of Chemistry journal article supplement (doi:10.1039/c6cp03398a), 2016-01-01
Supplement: c6cp03398a1.pdf [file c6cp03398a1.pdf]

## ***Supporting Information***

### **Iron-embedded C<sub>2</sub>N monolayer: a promising low-cost and high-activity single-atom catalyst for CO oxidation**

B. L. He,<sup>a\*</sup> J. S. Shen<sup>a</sup> and Z. X. Tian<sup>b</sup>

<sup>a</sup>*College of Physics and Electronic Engineering, Xinxiang University, Xinxiang 453003, China*

<sup>b</sup>*College of Physics and Information Engineering, Hebei Normal University, Shijiazhuang, Hebei 050024, China*

---

\* Corresponding author: E-mail: [hbl626@126.com](mailto:hbl626@126.com)

**Table S1.** The adsorption energies ( $E_{\text{ad}}$ , in eV) and some selected structural parameters for  $\text{CO}_2$  adsorbed on the  $\text{Fe}/\text{C}_2\text{N}$  monolayer with different convergence criteria in Hellmann–Feynman force ( $\text{eV}\text{\AA}^{-1}$ ). The units of the bond distance and bond angle are angstrom and degree, respectively.

|                        | 0.02         | 0.01         | 0.005        | 0.002        |
|------------------------|--------------|--------------|--------------|--------------|
| $E_{\text{ad}}$        | 0.230        | 0.228        | 0.227        | 0.227        |
| $d_{(\text{C-Fe})}$    | 1.995        | 1.995        | 1.994        | 1.994        |
| $d_{(\text{O-C})}$     | 1.252, 1.202 | 1.252, 1.202 | 1.252, 1.202 | 1.252, 1.202 |
| $\angle(\text{O-C-O})$ | 149.005      | 148.929      | 148.977      | 148.995      |

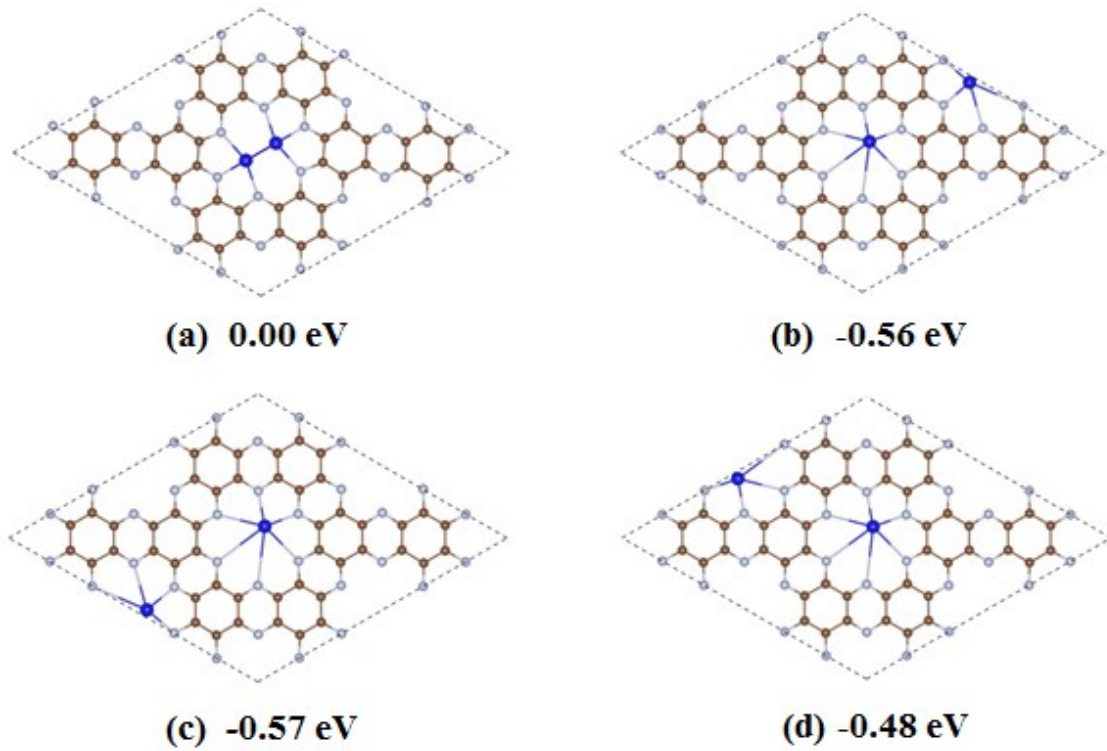

**Fig. S1.** The atomic structures of the most stable configuration of the  $\text{C}_2\text{N}$  monolayer with the adsorbed Fe dimer and some configurations with two separate Fe atoms. The energies for these structures have been calculated with respect to the configuration shown in (a).

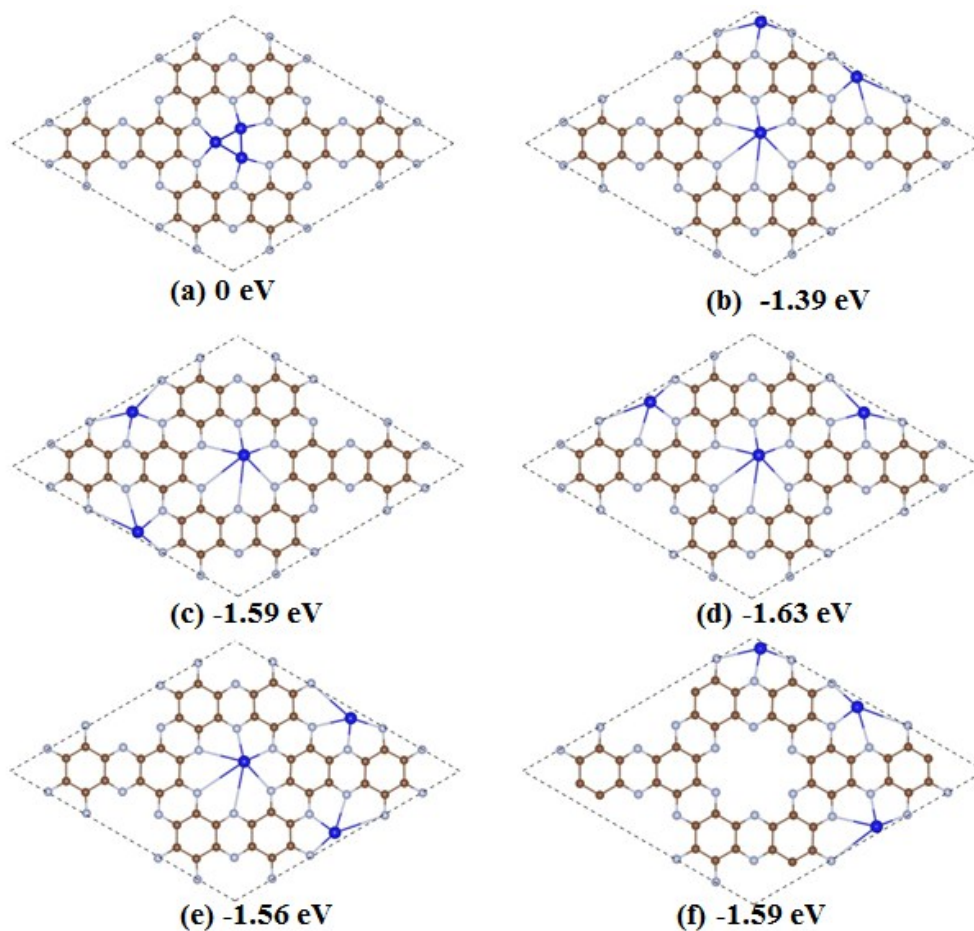

**Fig. S2.** The atomic structures of the most stable configuration of the  $C_2N$  monolayer with the adsorbed Fe trimer and some configurations with three separate Fe atoms. The energies for these structures have been calculated with respect to the configuration shown in (a).
